# Supplementary material for: Rational construction of yolk–shell CoP/N,P co-doped mesoporous carbon nanowires as anodes for ultralong cycle life sodium-ion batteries
Source: Royal Society of Chemistry journal article supplement (doi:10.1039/d2ra04153g), 2022-01-01
Supplement: d2ra04153g1.pdf [file d2ra04153g1.pdf]

## Supplementary Information

### Rational construction of yolk-shell CoP/N,P co-doped mesoporous carbon nanowires as anode for ultralong sodium-ion battery

Zhiya Lin<sup>ac</sup>, Xueqing Tan<sup>b</sup>, Yanping Lin<sup>a</sup>, Jianping Lin<sup>a</sup>, Wenyu Yang<sup>a</sup>, Zhiqiang  
Huang<sup>b</sup>, Shaoming Ying<sup>b\*</sup> and Xiaohui Huang<sup>b\*\*</sup>

<sup>a</sup> College of Mathematics and Physics, Ningde Normal University, Ningde 352100, China.

<sup>b</sup> College of Chemistry and Materials, Ningde Normal University, Fujian Province University  
Key Laboratory of Green Energy and Environment Catalysis, Ningde 352100, China.

<sup>c</sup> College of Physics and Energy, Fujian Normal University, Fujian Provincial Solar Energy  
Conversion and Energy Storage Engineering Technology Research Center, Fuzhou 350117,  
China.

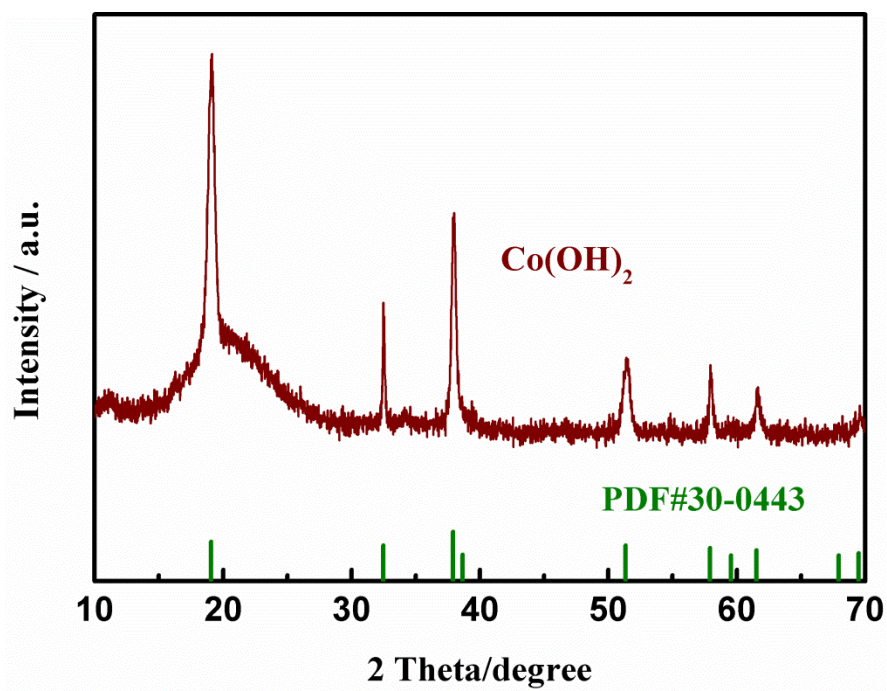

Fig. S1 XRD patterns of  $\text{Co(OH)}_2$  (Co-Pre) powders.

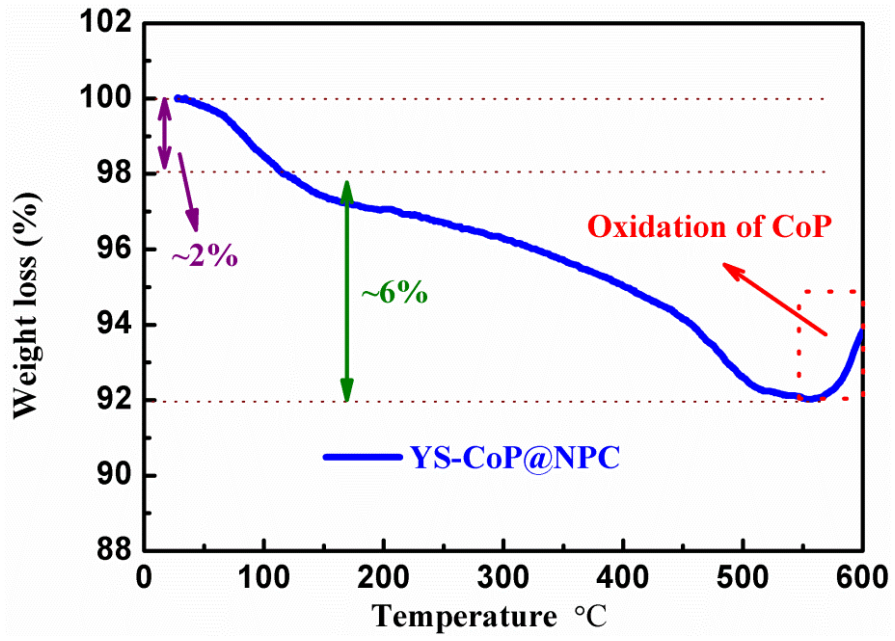

Fig. S2 TG curves of YS-CoP@NPC.

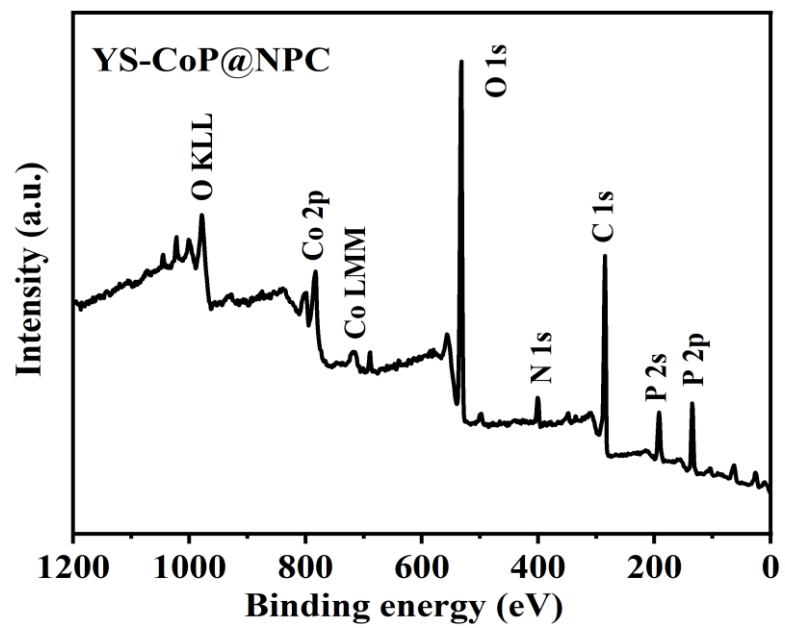

Fig. S3 The full survey scan spectrum of YS-CoP@NPC samples.

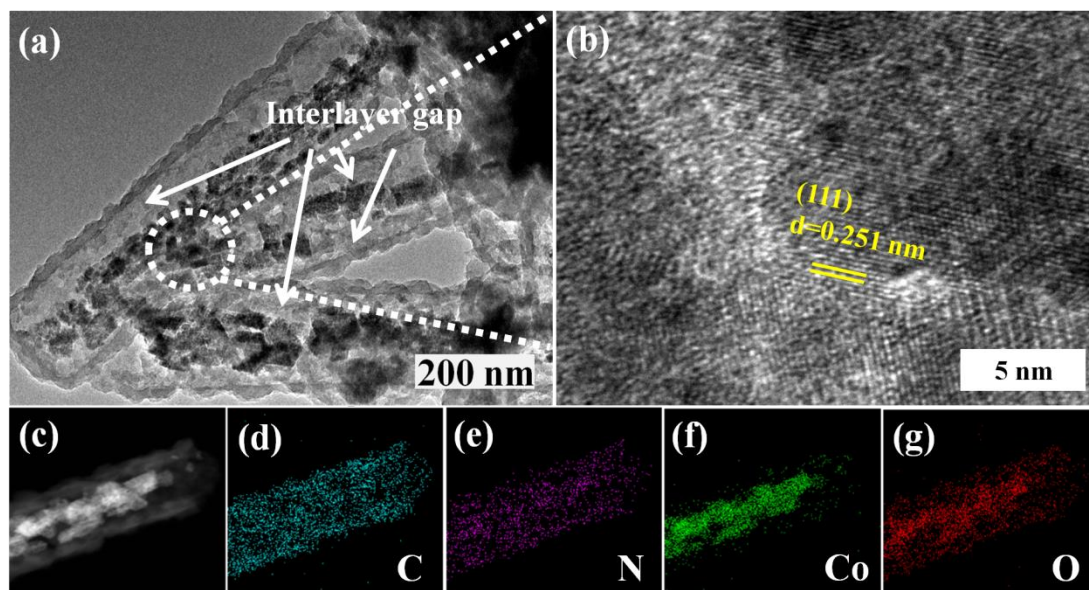

**Fig. S4** TEM images (a,b) and element maps (c-g) of YS-CoO@NC.

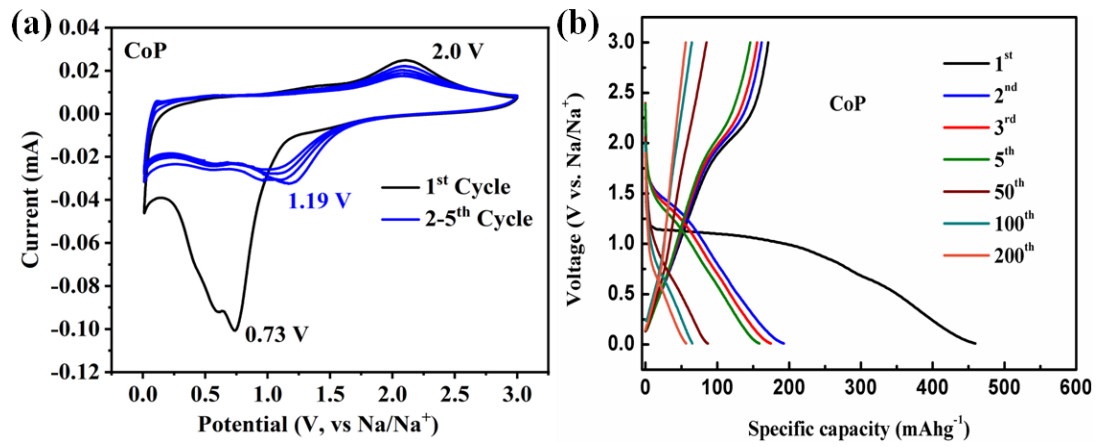

**Fig. S5** The (a) CV and (b) galvanostatic charge-discharge curves of CoP.

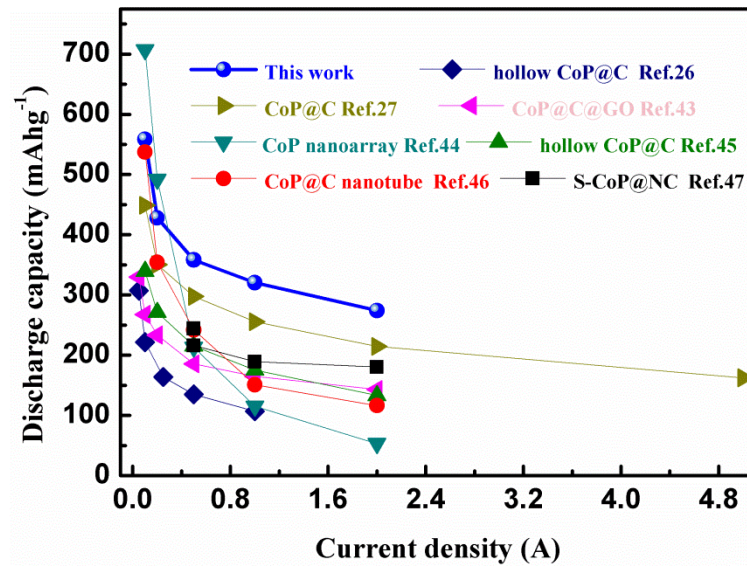

**Fig. S6** The comparison of SIBs performances between our work and other reports.

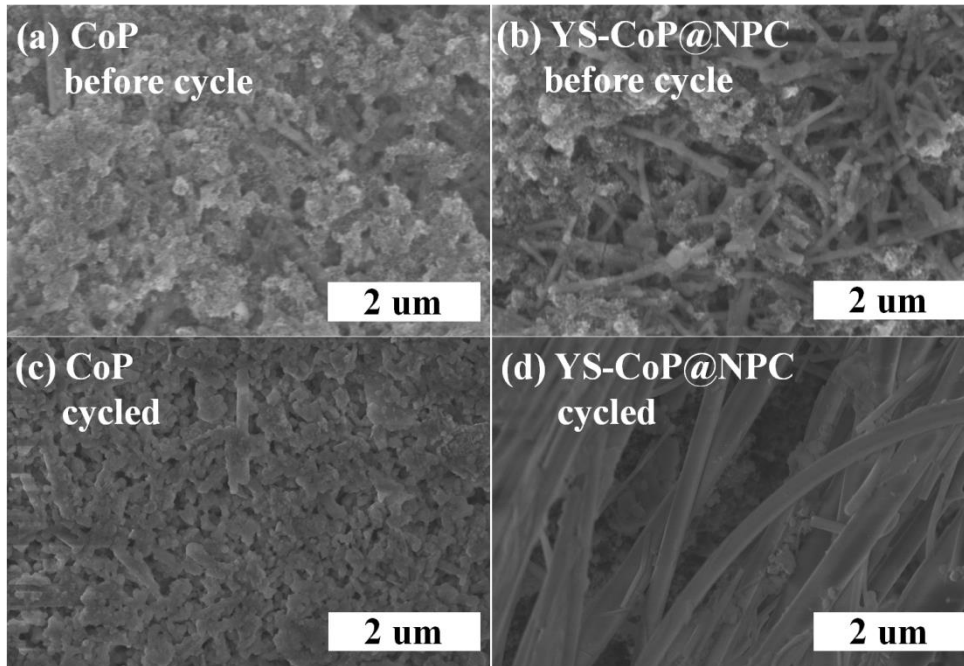

**Fig. S7** The surface morphologies of pristine (a) CoP, (b) YS-CoP@NPC electrodes and (c) CoP, (d) YS-CoP@NPC electrodes after 50 cycles.



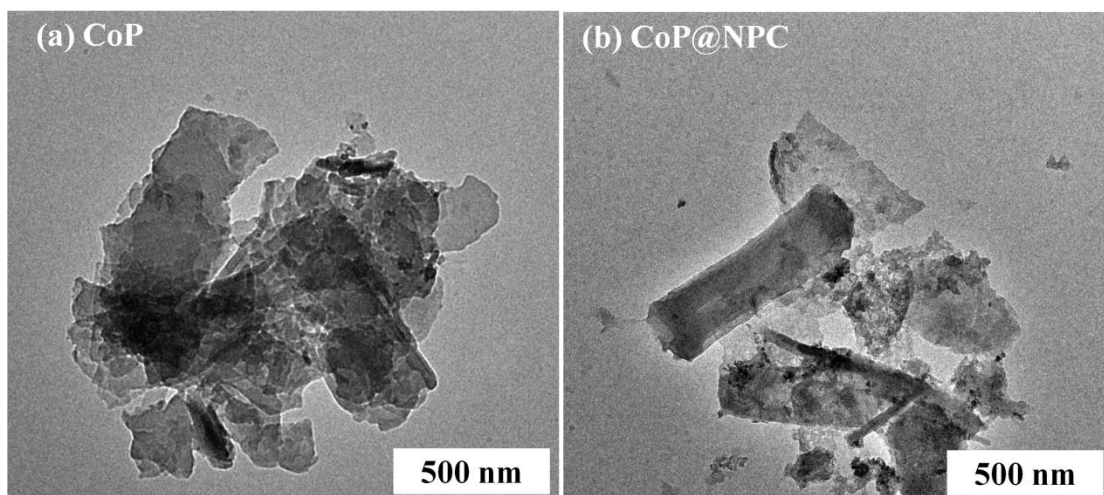

**Fig. S8** The TEM images of (a) CoP and (b) YS-CoP@NPC powders after 50 cycles.

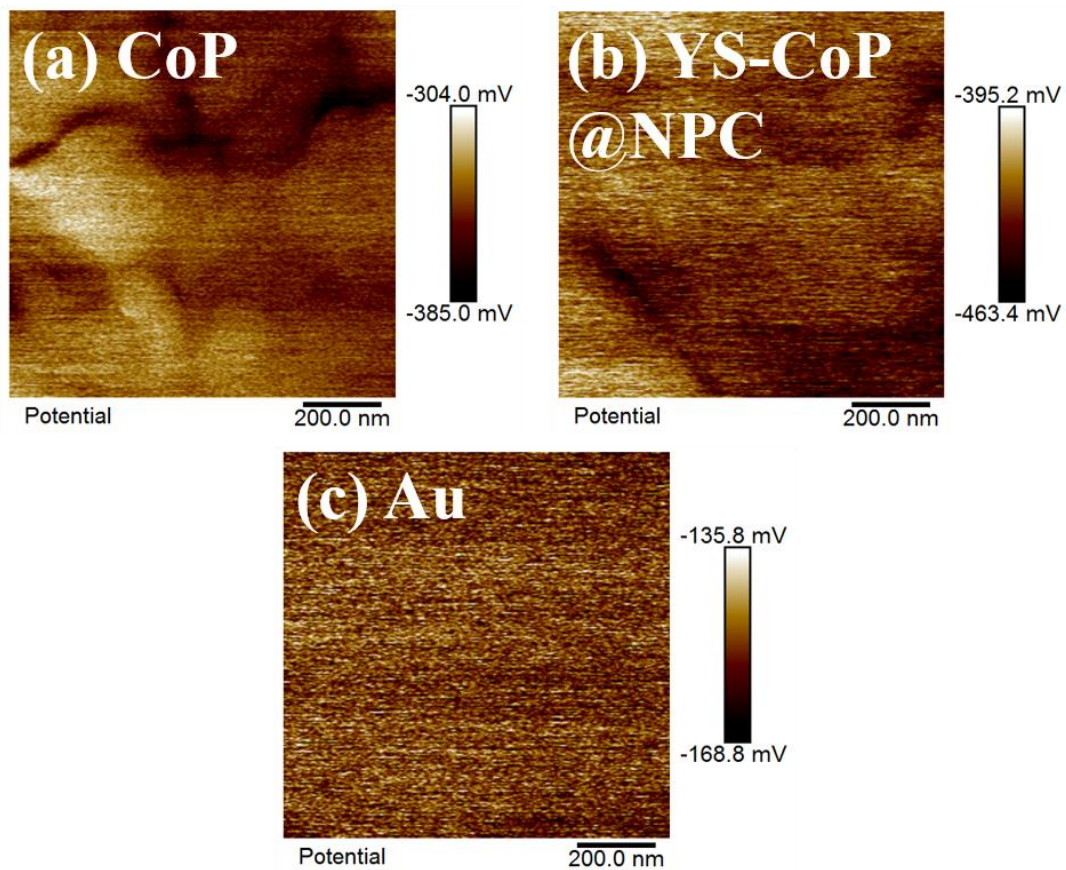

**Fig. S9** The surface potential maps of (a) CoP and (b) YS-CoP@NPC electrodes; (c) the surface potential map of Au as a reference sample.

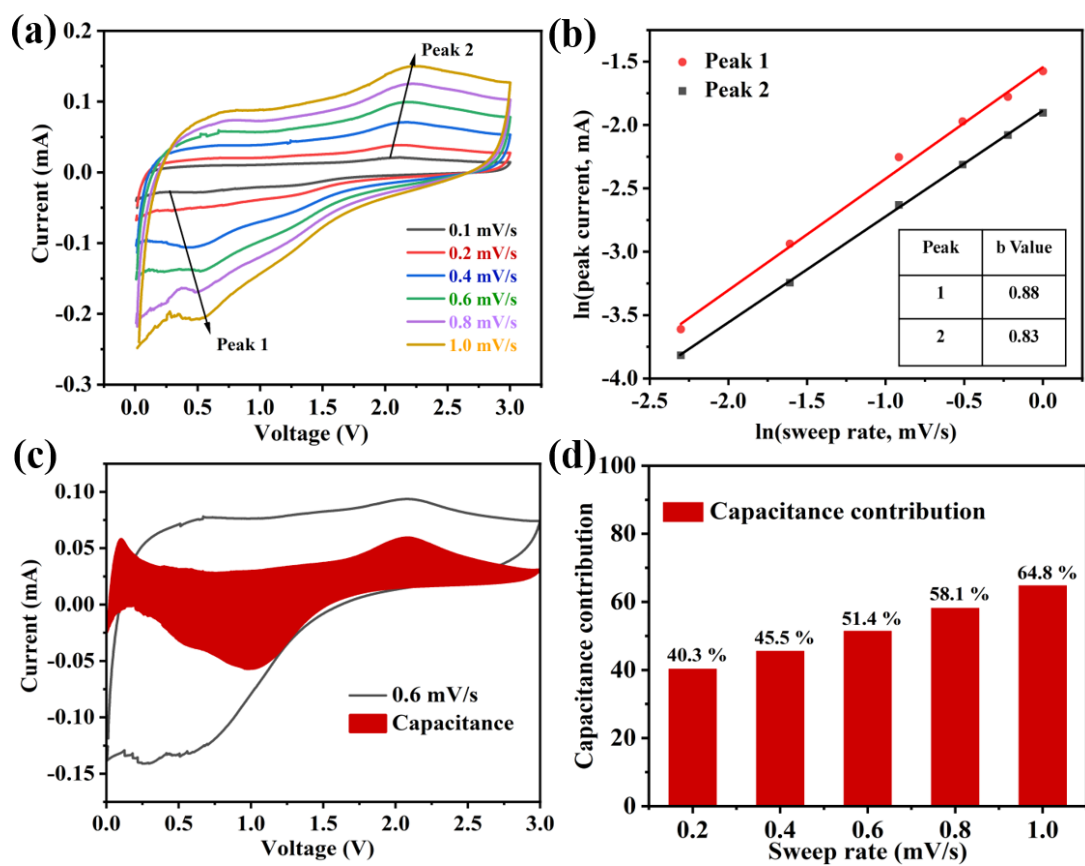

**Fig. S10** (a) CV curves and (b) corresponding log(i) plots at each redox peak of the YS-CoP@NPC electrode at various sweep rates; (c) Pseudocapacitive contribution shadow diagram in a CV curve at  $0.6 \text{ mV s}^{-1}$ ; (d) Percentage bar chart of pseudocapacitive contribution at different sweep rates.
